# Supplementary material for: Effect of Coconut and Chestnut Flour Supplementations on Texture, Nutritional and Sensory Properties of Baked Wheat Based Bread
Source: MDPI journal article supplement (doi:10.3390/molecules26154641), 2021-07-30
Supplement: s1 [file s1]

# Effect of coconut and chestnut flour supplementations on texture, nutritional and sensory properties of baked wheat based bread

Marianna Raczyk <sup>1,\*</sup>, Bartosz Kruszewski <sup>1,\*</sup> and Dorota Michałowska <sup>2</sup>

<sup>1</sup> Department of Food Technology and Assessment, Institute of Food Sciences, Warsaw University of Life Sciences – SGGW, Nowoursynowska 159 C, Warsaw, 02-776, Poland

<sup>2</sup> Prof. Wacław Dąbrowski Institute of Agricultural and Food Biotechnology – State Research Institute, Rakowiecka 36, Warsaw, 02-532, Poland; dorota.michalowska@ibprs.pl

\* Correspondence: marianna\_raczyk@sggw.edu.pl (MR); Tel.: +48-22-593-75-40, bartosz\_kruszewski@sggw.edu.pl (BK); Tel.: +48-22-593-75-20

## Supplementary material

### 1. Experimental breads

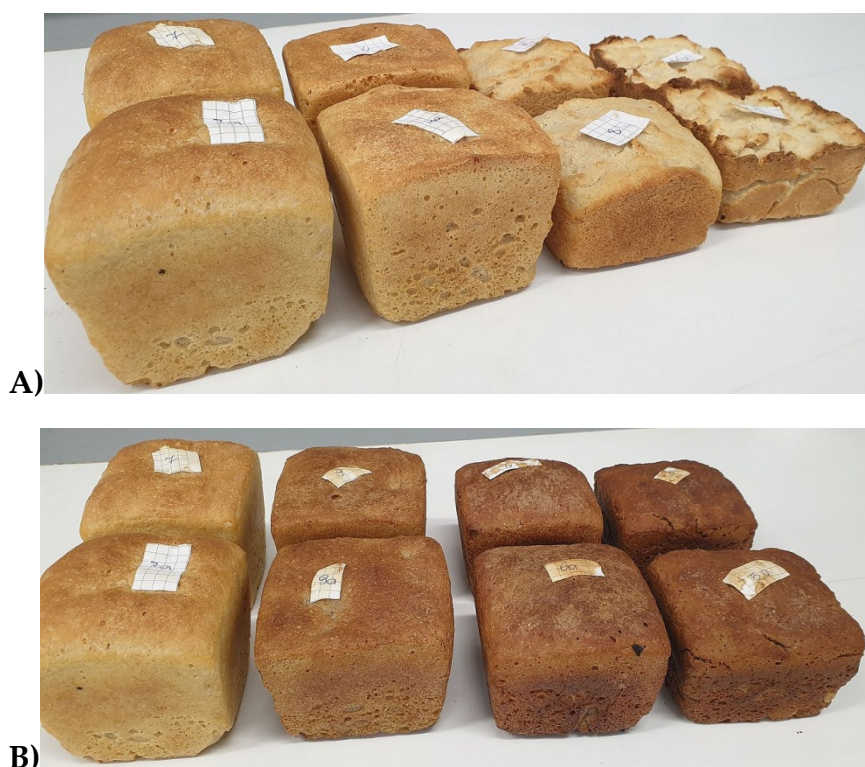

Figure S1. The appearance of tested breads compared with wheat bread as control sample. **A)** from left to right: control bread and breads supplemented with chestnut flour content 10, 30 and 50%; **B)** from left to right: control bread and breads supplemented with coconut flour content 10, 30 and 50%.

## 2. Sensory evaluation scores

Table S1. The scores of the sensory analysis of the obtained breads.

|             | crust color            | flavour                 | crumb<br>porosity      | taste                   | overall<br>acceptability |
|-------------|------------------------|-------------------------|------------------------|-------------------------|--------------------------|
| <b>C</b>    | 3.3 ± 0.7 <sup>a</sup> | 6.9 ± 0.3 <sup>ab</sup> | 9.2 ± 0.3 <sup>e</sup> | 5.3 ± 0.4 <sup>c</sup>  | 6.8 ± 0.4 <sup>b</sup>   |
| <b>CO5</b>  | 3.8 ± 0.6 <sup>a</sup> | 7.9 ± 0.3 <sup>b</sup>  | 8.9 ± 0.1 <sup>e</sup> | 5.4 ± 0.3 <sup>c</sup>  | 8.1 ± 0.3 <sup>c</sup>   |
| <b>CO10</b> | 3.5 ± 0.9 <sup>a</sup> | 6.2 ± 0.6 <sup>a</sup>  | 7.5 ± 0.4 <sup>d</sup> | 5.1 ± 0.5 <sup>c</sup>  | 6.9 ± 0.3 <sup>b</sup>   |
| <b>CO15</b> | 3.6 ± 0.8 <sup>a</sup> | 8.0 ± 0.5 <sup>b</sup>  | 8.1 ± 0.5 <sup>d</sup> | 5.4 ± 0.5 <sup>c</sup>  | 7.6 ± 0.5 <sup>bc</sup>  |
| <b>CO30</b> | 2.9 ± 0.5 <sup>a</sup> | 5.7 ± 0.4 <sup>a</sup>  | 2.1 ± 0.2 <sup>b</sup> | 3.3 ± 0.2 <sup>ab</sup> | 4.7 ± 0.2 <sup>a</sup>   |
| <b>CO50</b> | 3.0 ± 0.4 <sup>a</sup> | 5.6 ± 0.3 <sup>a</sup>  | 1.3 ± 0.2 <sup>a</sup> | 2.4 ± 0.2 <sup>a</sup>  | 5.0 ± 0.4 <sup>a</sup>   |
| <b>CH5</b>  | 7.5 ± 0.5 <sup>b</sup> | 8.2 ± 0.7 <sup>bc</sup> | 7.6 ± 0.5 <sup>d</sup> | 5.0 ± 0.4 <sup>c</sup>  | 7.3 ± 0.2 <sup>bc</sup>  |
| <b>CH10</b> | 7.8 ± 0.5 <sup>b</sup> | 7.0 ± 0.5 <sup>b</sup>  | 8.1 ± 0.2 <sup>d</sup> | 5.0 ± 0.3 <sup>c</sup>  | 7.6 ± 0.3 <sup>bc</sup>  |
| <b>CH15</b> | 8.6 ± 0.8 <sup>b</sup> | 8.6 ± 0.7 <sup>c</sup>  | 7.9 ± 0.3 <sup>d</sup> | 4.1 ± 0.3 <sup>b</sup>  | 7.6 ± 0.4 <sup>bc</sup>  |
| <b>CH30</b> | 9.2 ± 0.6 <sup>b</sup> | 7.3 ± 0.3 <sup>b</sup>  | 6.1 ± 0.4 <sup>c</sup> | 5.3 ± 0.5 <sup>c</sup>  | 6.9 ± 0.3 <sup>b</sup>   |
| <b>CH50</b> | 9.3 ± 0.5 <sup>b</sup> | 6.7 ± 0.5 <sup>ab</sup> | 5.3 ± 0.2 <sup>c</sup> | 2.8 ± 0.2 <sup>a</sup>  | 5.8 ± 0.4 <sup>ab</sup>  |

n = 10, for each bread type. The values represent means ± standard deviation. The values in a column with different letters are significantly different ( $p < 0.05$ ).
